# Supplementary material for: Factors associated with general practitioners' routines and comfortability with assessing female genital cutting: a cross-sectional survey
Source: Springer Nature journal article supplement (doi:10.1186/s12913-023-09085-4), 2023-01-25
Supplement: MOESM1 [file 23953650]

# Physical and psychological healthcare for women subjected to female genital mutilation: a study among general practitioners in Norway

## 1. Background information

1.1. Gender

Female

Male

1.2. How old are you?

< 30 years

30-39 years

40-49 years

50-59 years

≥ 60 years

1.3. In which health region do you work?

Norway – region North

Norway – region Middle

Norway – region West

Norway – region South

Norway – region East

1.4. Do you work in:

City

Rural area

1.5. How many years of work experience do you have after graduating from medical school?

≤ 5 years

6-15 years

16-25 years

26-35 years

≥ 36 years

1.6. How many years of work experience do you have after being certified as specialist in general practice?

I am not yet certified as specialist

≤ 5 years

6-15 years

16-25 years

26-35 years

≥ 36 years

1.7. Did you receive your medical degree from Norway?

Yes

Partly

No

1.8. Did you receive training on female genital mutilation (in general) during your medical studies?

Yes

Partly

No

1.9. After graduating from medical school, have you received training on female genital mutilation (in general) during your further/continuous medical training?

Yes

Partly

No

1.10. Have you received training on health complications related to female genital mutilation?

Yes

Partly

No

## **2. Knowledge and competence on female genital mutilation**

### **Classification and legislation**

2.1. Do you feel you need more knowledge on the WHO classification of the different types of female genital mutilation (I – IV)?

- Yes
- Partly
- No

2.2. Are you familiar with the medical codes for female genital mutilation (ICD-10, or NCMP-NCPS-NCPR)?

- Yes
- Partly
- No

2.3. Do you feel you need to know more about the legislation related to female genital mutilation?

- Yes
- Partly
- No

**Cultural competence**

2.4. Do you think you have adequate knowledge concerning why female genital mutilation is practiced?

- Yes
- Partly
- No

2.5. Do you think you have adequate knowledge concerning the traditional and cultural meaning of female genital mutilation for the women?

- Yes
- Partly
- No

2.6. Do you feel uncomfortable to talk to affected patients about female genital mutilation?

- Yes
- Partly
- No

2.6.1. If you answered yes in question 2.6., is this because of patient-related issues?

- Yes

Partly

No

2.6.2. If you answered yes in question 2.6., is this because of issues related to you?

Yes

Partly

No

2.7. In your consultations with female patients originating from countries where female genital mutilation is practiced (See the map), do you routinely ask the patients whether they have been subjected to female genital mutilation when/if they present with any of the following health related issues?

2.7.1. Urogenital problems

Yes

Sometimes

No

2.7.2. Pregnancy

Yes

Sometimes

No

2.7.3. Mental health problems

Yes

Sometimes

No

2.7.4. Sexual health problems

Yes

Sometimes

No

2.8. Have you ever been consulted by women who have health problems related to female genital mutilation?

Yes

No

### 3. Consultations

*This section is only visible for those who select the "yes" option in question 2.8.*

3.1. Have you ever been consulted by women who directly indicated that their health problems are related to female genital mutilation?

Yes

No

3.2. Have you ever been consulted by women who have health problems related to female genital mutilation, but they were unaware of the link between their problems and female genital mutilation?

Yes

No
